# Supplementary material for: Identification of Novel SARS-CoV-2 Inhibitors: A Structure-Based Virtual Screening Approach
Source: Hindawi journal article supplement (doi:10.1155/2021/1901484), 2021-02-08
Supplement: f1 [file 1901484.f1.docx]

**Identification of novel SARS-CoV-2 inhibitors: A Structure Based Virtual Screening approch**

El Aissouq Abdellaha, Chedadi Oussamaa, Mohammed Bouachrineb,c and Abdelkrim Ouammoua*

a LIMOME Laboratory, Faculty of Sciences Dhar El Mahraz, Sidi Mohamed Ben Abdellah University, Fez, Morocco.

b MCNS Laboratory, Faculty of sciences, Moulay Ismail University, Meknes, Morocco.

c EST Khenifra, Sultan Moulay Sliman University, Morocco

* Corresponding Author: E-mail: [ouammoukarim@gmail.com](mailto:ouammoukarim@gmail.com)

**Supplemental Table and Figures**

**Table S1**. Chemical structures of Ritonavir analogues selected from the literature. From MOL 1 to MOL 177, are synthetized by Kempf DJ et al (1998), and from MOL 178 to MOL 188, are synthetized by Kaye PT et al (2004). The chemical strucutres of all compounds were disgned and optimized using chemDraw and Chem3D software’s.

**Table S1** the chemical structures of the data set compound

| **No** | **STRUCTURE** | **No** | **STRUCTURE** | **No** | **STRUCTURE** | **No** | **STRUCTURE** |
| --- | --- | --- | --- | --- | --- | --- | --- |
| **MOL1a** |  | **MOL49 a** |  | **MOL97 a** |  | **MOL145 a** |  |
| **MOL2 a** |  | **MOL50 a** |  | **MOL98 a** |  | **MOL146 a** |  |
| **MOL3 a** |  | **MOL51 a** |  | **MOL99 a** |  | **MOL147 a** |  |
| **MOL4 a** |  | **MOL52 a** |  | **MOL100 a** |  | **MOL148 a** |  |
| **MOL5 a** |  | **MOL53 a** |  | **MOL101 a** |  | **MOL149 a** |  |
| **MOL6 a** |  | **MOL54 a** |  | **MOL102 a** |  | **MOL150 a** |  |
| **MOL7 a** |  | **MOL55 a** |  | **MOL103 a** |  | **MOL151 a** |  |
| **MOL8 a** |  | **MOL56 a** |  | **MOL104 a** |  | **MOL152 a** |  |
| **MOL9 a** |  | **MOL57 a** |  | **MOL105 a** |  | **MOL153 a** |  |
| **MOL10 a** |  | **MOL58 a** |  | **MOL106 a** |  | **MOL154 a** |  |
| **MOL11 a** |  | **MOL59 a** |  | **MOL107 a** |  | **MOL155 a** |  |
| **MOL12 a** |  | **MOL60 a** |  | **MOL108 a** |  | **MOL156 a** |  |
| **MOL13 a** |  | **MOL61 a** |  | **MOL109 a** |  | **MOL157 a** |  |
| **MOL14 a** |  | **MOL62 a** |  | **MOL110 a** |  | **MOL158 a** |  |
| **MOL15 a** |  | **MOL63 a** |  | **MOL111 a** |  | **MOL159 a** |  |
| **MOL16 a** |  | **MOL64 a** |  | **MOL112 a** |  | **MOL160 a** |  |
| **MOL17 a** |  | **MOL65 a** |  | **MOL113 a** |  | **MOL161 a** |  |
| **MOL18 a** |  | **MOL66 a** |  | **MOL114 a** |  | **MOL162 a** |  |
| **MOL19 a** |  | **MOL67 a** |  | **MOL115 a** |  | **MOL163 a** |  |
| **MOL20 a** |  | **MOL68 a** |  | **MOL116 a** |  | **MOL164 a** |  |
| **MOL21 a** |  | **MOL69 a** |  | **MOL117 a** |  | **MOL165 a** |  |
| **MOL22 a** |  | **MOL70 a** |  | **MOL118 a** |  | **MOL166 a** |  |
| **MOL23 a** |  | **MOL71 a** |  | **MOL119 a** |  | **MOL167 a** |  |
| **MOL24 a** |  | **MOL72 a** |  | **MOL120 a** |  | **MOL168 a** |  |
| **MOL25 a** |  | **MOL73 a** |  | **MOL121 a** |  | **MOL169 a** |  |
| **MOL26 a** |  | **MOL74 a** |  | **MOL122 a** |  | **MOL170 a** |  |
| **MOL27 a** |  | **MOL75 a** |  | **MOL123 a** |  | **MOL171 a** |  |
| **MOL28 a** |  | **MOL76 a** |  | **MOL124 a** |  | **MOL172 a** |  |
| **MOL29 a** |  | **MOL77 a** |  | **MOL125 a** |  | **MOL173 a** |  |
| **MOL30 a** |  | **MOL78 a** |  | **MOL126 a** |  | **MOL174 a** |  |
| **MOL31 a** |  | **MOL79 a** |  | **MOL127 a** |  | **MOL175 a** |  |
| **MOL32 a** |  | **MOL80 a** |  | **MOL128 a** |  | **MOL176 a** |  |
| **MOL33 a** |  | **MOL81 a** |  | **MOL129 a** |  | **MOL177 a** |  |
| **MOL34 a** |  | **MOL82 a** |  | **MOL130 a** |  | **MOL178 b** |  |
| **MOL35 a** |  | **MOL83 a** |  | **MOL131 a** |  | **MOL179 b** |  |
| **MOL36 a** |  | **MOL84 a** |  | **MOL132 a** |  | **MOL180 b** |  |
| **MOL37 a** |  | **MOL85 a** |  | **MOL133 a** |  | **MOL181 b** |  |
| **MOL38 a** |  | **MOL86 a** |  | **MOL134 a** |  | **MOL182 b** |  |
| **MOL39 a** |  | **MOL87 a** |  | **MOL135 a** |  | **MOL183 b** |  |
| **MOL40 a** |  | **MOL88 a** |  | **MOL136 a** |  | **MOL184 b** |  |
| **MOL41 a** |  | **MOL89 a** |  | **MOL137 a** |  | **MOL185 b** |  |
| **MOL42 a** |  | **MOL90 a** |  | **MOL138 a** |  | **MOL186 b** |  |
| **MOL43 a** |  | **MOL91 a** |  | **MOL139 a** |  | **MOL187 b** |  |
| **MOL44 a** |  | **MOL92 a** |  | **MOL140 a** |  | **MOL188 b** |  |
| **MOL45 a** |  | **MOL93 a** |  | **MOL141 a** |  |  |  |
| **MOL46 a** |  | **MOL94 a** |  | **MOL142 a** |  |  |  |
| **MOL47 a** |  | **MOL95 a** |  | **MOL143 a** |  |  |  |
| **MOL48 a** |  | **MOL96 a** |  | **MOL144 a** |  |  |  |

a synthetized by Kempf DJ et al (1998) and bsynthetized by Kaye PT et al (2004)

**Table S2.** Binding free energy of DrugBank compounds. The calculation was realized using Auto Dock Vina, implicated in PyRx Tool. Each Drug was calculated using 9 conformations which are classified by binding affinity (kcal/mol).

**Table S2** The binding free energy of the selected DrugBank database compounds

| ID | Binding energy | ID | Binding energy | ID | Binding energy | ID | Binding energy |
| --- | --- | --- | --- | --- | --- | --- | --- |
| DB00503 | -7.4 | DB00192 | -6.7 | DB00417 | -6.7 | DB00561 | -7.1 |
| DB00428 | -5.8 | DB00194 | -6.2 | DB00422 | -5.7 | DB00562 | -7.7 |
| DB00118 | -7.4 | DB00116 | -7.6 | DB00425 | -7.6 | DB00563 | -8.2 |
| DB00131 | -6.8 | DB00121 | -5.8 | DB00427 | -7.0 | DB00567 | -6.8 |
| DB00150 | -6.0 | DB00140 | -7.4 | DB00428 | -5.8 | DB00572 | -6.6 |
| DB00157 | -8.2 | DB00158 | -7.8 | DB00430 | -8.0 | DB00577 | -6.2 |
| DB00168 | -6.0 | DB00177 | -7.6 | DB00432 | -6.9 | DB00578 | -7.0 |
| DB00178 | -6.8 | DB00186 | -7.1 | DB00436 | -7.1 | DB00582 | -6.6 |
| DB00193 | -5.7 | DB00198 | -6.2 | DB00438 | -7.9 | DB00584 | -6.7 |
| DB00197 | -8.2 | DB00206 | -7.4 | DB00439 | -7.5 | DB00587 | -7.1 |
| DB00203 | -8.5 | DB00211 | -5.8 | DB00441 | -6.4 | DB00589 | -7.4 |
| DB00207 | -5.5 | DB00214 | -7.4 | DB00442 | -7.5 | DB00590 | -7.8 |
| DB00213 | -6.5 | DB00216 | -7.3 | DB00445 | -6.0 | DB00595 | -7.0 |
| DB00215 | -6.0 | DB00220 | -7.4 | DB00446 | -6.1 | DB00598 | -6.8 |
| DB00219 | 6.1 | DB00224 | -8.3 | DB00447 | -6.8 | DB00601 | -7.2 |
| DB00221 | -5.6 | DB00242 | -6.7 | DB00448 | -7.3 | DB00604 | -6.5 |
| DB00238 | -7.0 | DB00246 | -7.5 | DB00450 | -7.4 | DB00605 | -7.3 |
| DB00245 | -7.4 | DB00248 | -7.2 | DB00453 | -7.0 | DB00606 | -7.5 |
| DB00247 | -7.3 | DB00251 | -7.2 | DB00455 | -7.8 | DB00607 | -7.2 |
| DB00249 | -6.2 | DB00256 | -7.3 | DB00456 | -6.6 | DB00611 | -6.6 |
| DB00252 | -6.5 | DB00267 | -7.6 | DB00457 | -7.2 | DB00614 | -6.6 |
| DB00261 | -6.1 | DB00274 | -6.6 | DB00462 | -6.7 | DB00616 | -7.9 |
| DB00270 | -5.5 | DB00280 | -6.1 | DB00465 | -7.0 | DB00618 | -7.3 |
| DB00275 | -7.9 | DB00285 | -5.8 | DB00467 | -7.2 | DB00619 | -8.8 |
| DB00283 | -6.6 | DB00293 | -7.7 | DB00468 | -6.6 | DB00622 | -6.8 |
| DB00287 | -6.4 | DB00296 | -6.2 | DB00470 | -7.1 | DB00625 | -6.4 |
| DB00295 | -7.3 | DB00298 | -6.9 | DB00471 | -7.6 | DB00628 | -7.8 |
| DB00297 | -6.2 | DB00303 | -7.9 | DB00476 | -6.4 | DB00631 | -6.9 |
| DB00301 | -7.4 | DB00310 | -7.5 | DB00479 | -6.8 | DB00637 | -7.6 |
| DB00305 | -6.8 | DB00317 | -7.6 | DB00480 | -7.1 | DB00640 | -6.8 |
| DB00315 | -7.0 | DB00320 | -8.6 | DB00481 | -8.0 | DB00647 | -5.9 |
| DB00319 | -8.6 | DB00327 | -6.7 | DB00482 | -7.8 | DB00649 | -6.2 |
| DB00322 | -6.2 | DB00334 | -7.4 | DB00485 | -7.5 | DB00652 | -6.8 |
| DB00328 | -7.3 | DB00340 | -7.1 | DB00486 | -6.2 | DB00656 | -7.2 |
| DB00338 | -6.6 | DB00346 | -6.7 | DB00497 | -7.1 | DB00661 | -6.2 |
| DB00343 | -5.8 | DB00355 | -7.0 | DB00502 | -7.1 | DB00665 | -7.4 |
| DB00353 | -7.4 | DB00358 | -7.8 | DB00504 | -6.4 | DB00671 | -7.0 |
| DB00357 | -5.5 | DB00358 | -7.8 | DB00507 | -7.0 | DB00673 | -7.9 |
| DB00365 | -7.9 | DB00370 | -7.1 | DB00519 | -6.9 | DB01072 | -7.7 |
| DB00376 | -6.8 | DB00381 | -6.5 | DB00521 | -6.4 | DB01232 | -8.9 |
| DB00383 | -6.6 | DB00387 | -6.7 | DB00522 | -8.0 | DB01601 | -7.1 |
| DB00391 | -6.5 | DB00393 | -5.8 | DB00527 | -6.2 | DB02128 | -7.4 |
| DB00398 | -8.1 | DB00400 | -7.0 | DB00528 | -8.4 | DB04609 | -7.3 |
| DB00401 | -6.5 | DB00401 | -6.5 | DB00532 | -5.6 | DB04748 | -7.1 |
| DB00409 | -5.8 | DB00402 | -8.1 | DB00535 | -7.4 | DB09065 | -6.7 |
| DB00413 | -5.3 | DB00409 | -5.8 | DB00537 | -7.6 | DB11596 | -7.7 |
| DB00415 | -7.1 | DB00412 | -7.0 | DB00542 | -7.6 | DB00152 | -6.0 |
| DB00422 | -5.7 | DB00413 | -5.3 | DB00546 | -7.5 | DB00701 | -7.4 |
| DB00427 | -7.0 | DB00414 | -6.9 | DB00549 | -8.5 | DB01319 | -7.7 |
| DB00428 | -5.8 | DB00415 | -7.1 | DB00560 | -6.-8 | DB01601 | -7.2 |
| DB12963 | -7.6 | DB03797 | -8.3 | DB08185 | -7.0 | DB07397 | -8.9 |
| DB12799 | -8.9 | DB14785 | -8.7 | DB09050 | -7.3 | DB04477 | -8.6 |
| DB03478 | -6.8 | DB12760 | -8.2 | DB12939 | -8.0 | DB09299 | -7.4 |
| DB14733 | -7.7 | DB04395 | -7.7 | DB14862 | -7.9 | DB03126 | -8.1 |
| DB06346 | -6.8 | DB00696 | -9.1 | DB14128 | -7.7 | DB02557 | -7.3 |
| DB13242 | -7.5 | DB12329 | -7.9 | DB13667 | -7.7 | DB01831 | -8.2 |
| DB06267 | -7.8 | DB04099 | -7.9 | DB05553 | -8.3 | DB06636 | -7.4 |
| DB13135 | -7.7 | DB03363 | -8.2 | DB06455 | -8.6 | DB04877 | -7.3 |
| DB04201 | -7.5 | DB03461 | -7.2 | DB11913 | -9.6 | DB00206 | -7.5 |
| DB04023 | -7.3 | DB01051 | -7.5 | DB03070 | -8.2 | DB04421 | -7.8 |
| DB06070 | -8.5 | DB15399 | -8.1 | DB13631 | -7.3 | DB00762 | -9.2 |
| DB11740 | -8.1 | DB14976 | -9.5 | DB00385 | -7.3 | DB04362 | -7.2 |
| DB11796 | -8.8 | DB06290 | -8.7 | DB14850 | -8.1 | DB06590 | -7.0 |
| DB13345 | -9.5 | DB04651 | -7.7 | DB02732 | -7.8 | DB15078 | -7.2 |
| DB11275 | -6.5 | DB02498 | -8.1 | DB11878 | -8.2 | DB12138 | -8.8 |
| DB11274 | -8.9 | DB01180 | -7.7 | DB01200 | -8.0 | DB12457 | -8.5 |
| DB11273 | -9.6 | DB02082 | -6.9 | DB14989 | -8.7 | DB12222 | -8.3 |
| DB14942 | -7.7 | DB14773 | -9.6 | DB13997 | -7.0 | DB12318 | -8.6 |
| DB13575 | -6.9 | DB05116 | -7.4 | DB14906 | -7.8 | DB15057 | -8.2 |
| DB03020 | -8.4 | DB14903 | -7.9 | DB08934 | -7.9 | DB14859 | -8.2 |
| DB03966 | -8.0 | DB15206 | -7.7 | DB04071 | -7.4 | DB11966 | -8.0 |

**Table S3.** Binding free energy of Ritonavir derivatives. The calculation was realized using Auto Dock Vina, implicated in PyRx Tool. Each Drug was calculated using 9 conformations which are classified by binding affinity (kcal/mol).

**Table S3** The binding free energy of data set compound

| No | Binding energy | No | Binding energy | No | Binding energy | No | Binding energy |
| --- | --- | --- | --- | --- | --- | --- | --- |
| Ritonavir | -7.4 | Mol47 a | -7.3 | Mol94 a | -6.9 | Mol141 a | -7.4 |
| Mol1a | -6.8 | Mol48 a | -7.6 | Mol95 a | -7.8 | Mol142 a | -7.9 |
| Mol2 a | -7.0 | Mol49 a | -8.2 | Mol96 a | -7.6 | Mol143 a | -7.3 |
| Mol3 a | -7.0 | Mol50 a | -7.4 | Mol97 a | -7.3 | Mol144 a | -7.2 |
| Mol4 a | -7.4 | Mol51 a | -7.3 | Mol98 a | -7.4 | Mol145 a | -7.8 |
| Mol5 a | -7.5 | Mol52 a | -6.4 | Mol99 a | -7.2 | Mol146 a | -7.5 |
| Mol6 a | -7.5 | Mol53 a | -7.6 | Mol100 a | -7.0 | Mol147 a | -7.6 |
| Mol7 a | -6.6 | Mol54 a | -6.7 | Mol101 a | -7.7 | Mol148 a | -7.2 |
| Mol8 a | -7.3 | Mol55 a | -7.0 | Mol102 a | -7.4 | Mol149 a | -6.0 |
| Mol9 a | -7.5 | Mol56 a | -7.1 | Mol103 a | -7.4 | Mol150 a | -6.1 |
| Mol10 a | -7.6 | Mol57 a | -7.7 | Mol104 a | -7.9 | Mol151 a | -6.1 |
| Mol11 a | -7.5 | Mol58 a | -7.3 | Mol105 a | -7.1 | Mol152 a | -7.3 |
| Mol12 a | -7.3 | Mol59 a | -7.4 | Mol106 a | -7.3 | Mol153 a | -7.6 |
| Mol13 a | -7.6 | Mol60 a | -7.6 | Mol107 a | -6.6 | Mol154 a | -7.3 |
| Mol14 a | -6.5 | Mol61 a | -8.4 | Mol108 a | -7.4 | Mol155 a | -7.8 |
| Mol15 a | -7.6 | Mol62 a | -7.8 | Mol109 a | -8.0 | Mol156 a | -7.0 |
| Mol16 a | -7.7 | Mol63 a | -8.0 | Mol110 a | -7.6 | Mol157 a | -8.0 |
| Mol17 a | -7.0 | Mol64 a | -7.7 | Mol111 a | -7.7 | Mol158 a | -6.4 |
| Mol18 a | -7.4 | Mol65 a | -7.9 | Mol112 a | -7.4 | Mol159 a | -7.1 |
| Mol19 a | -7.4 | Mol66 a | -7.5 | Mol113 a | -7.6 | Mol160 a | -7.3 |
| Mol20 a | -7.3 | Mol67 a | -7.2 | Mol114 a | -7.5 | Mol161 a | -6.8 |
| Mol21 a | -7.6 | Mol68 a | -6.7 | Mol115 a | -7.5 | Mol162 a | -6.9 |
| Mol22 a | -7.7 | Mol69 a | -7.5 | Mol116 a | -7.7 | Mol163 a | -6.9 |
| Mol23 a | -7.5 | Mol70 a | -6.8 | Mol117 a | -7.6 | Mol164 a | -7.0 |
| Mol24 a | -7.0 | Mol71 a | -7.3 | Mol118 a | -7.4 | Mol165 a | -7.5 |
| Mol25 | -7.1 | Mol72 a | -7.7 | Mol119 a | -7.7 | Mol166 a | -7.3 |
| Mol26 a | -7.3 | Mol73 a | -7.9 | Mol120 a | -7.4 | Mol167 a | -7.2 |
| Mol27 a | -7.2 | Mol74 a | -7.6 | Mol121 a | -6.9 | Mol168 a | -8.1 |
| Mol28 a | -7.8 | Mol75 a | -7.8 | Mol122 a | -7.9 | Mol169 a | -8.0 |
| Mol29 a | -6.9 | Mol76 a | -7.6 | Mol123 a | -7.8 | Mol170 a | -6.3 |
| Mol30 a | -7.3 | Mol77 a | -7.3 | Mol124 a | -7.3 | Mol171 a | -6.8 |
| Mol31 a | -6.5 | Mol78 a | -7.9 | Mol125 a | -7.4 | Mol172 a | -6.7 |
| Mol32 a | -7.3 | Mol79 a | -8 | Mol126 a | -6.8 | Mol173 a | -7.6 |
| Mol33 a | -6.8 | Mol80 a | -7.6 | Mol127 a | -7.2 | Mol174 a | -7.2 |
| Mol34 a | -7.2 | Mol81 a | -8.2 | Mol128 a | -7.2 | Mol175 a | -8.1 |
| Mol35 a | -7.2 | Mol82 a | -7.1 | Mol129 a | -7.6 | Mol176 a | -8.6 |
| Mol36 a | -6.5 | Mol83 a | -6.8 | Mol130 a | -7.4 | Mol177 a | -7.8 |
| Mol37 a | -7.3 | Mol84 a | -7.5 | Mol131 a | -7.5 | Mol178 b | -7.9 |
| Mol38 a | -7.3 | Mol85 a | -7.8 | Mol132 a | -7.4 | Mol179 b | -7.4 |
| Mol39 a | -6.4 | Mol86 a | -7.2 | Mol133 a | -7.9 | Mol180 b | -8.0 |
| Mol40 a | -7.4 | Mol87 a | -6.1 | Mol134 a | -7.7 | Mol181 b | -9.1 |
| Mol41 a | -8.2 | Mol88 a | -7.8 | Mol135 a | -7.4 | Mol182 b | -8.1 |
| Mol42 a | -7.1 | Mol89 a | -7.5 | Mol136 a | -7.4 | Mol183 b | -7.6 |
| Mol43 a | -6.7 | Mol90 a | -7.6 | Mol137 a | -7.4 | Mol184 b | -8.2 |
| Mol44 a | -7.6 | Mol91 a | -7.3 | Mol138 a | -7.6 | Mol185 b | -7.3 |
| Mol45 a | -7.5 | Mol92 a | -7.1 | Mol139 a | -8.0 | Mol186 b | -7.2 |
| Mol46 a | -7.4 | Mol93 a | -7.3 | Mol140 a | -7.2 | Mol187 b | -9.0 |
|  |  |  |  |  |  | Mol188 b | -8.1 |

a synthetized by Kempf DJ et al (1998) and bsynthetized by Kaye PT et al (2004)
